# Supplementary figures and images for: A new synthetic method: pyromellitic dianhydride preparation by Ni–Mo/ZrO2 catalytic oxidation
Source: Royal Society of Chemistry journal article supplement (doi:10.1039/d3re00607g), 2024-01-01

Supplemental material

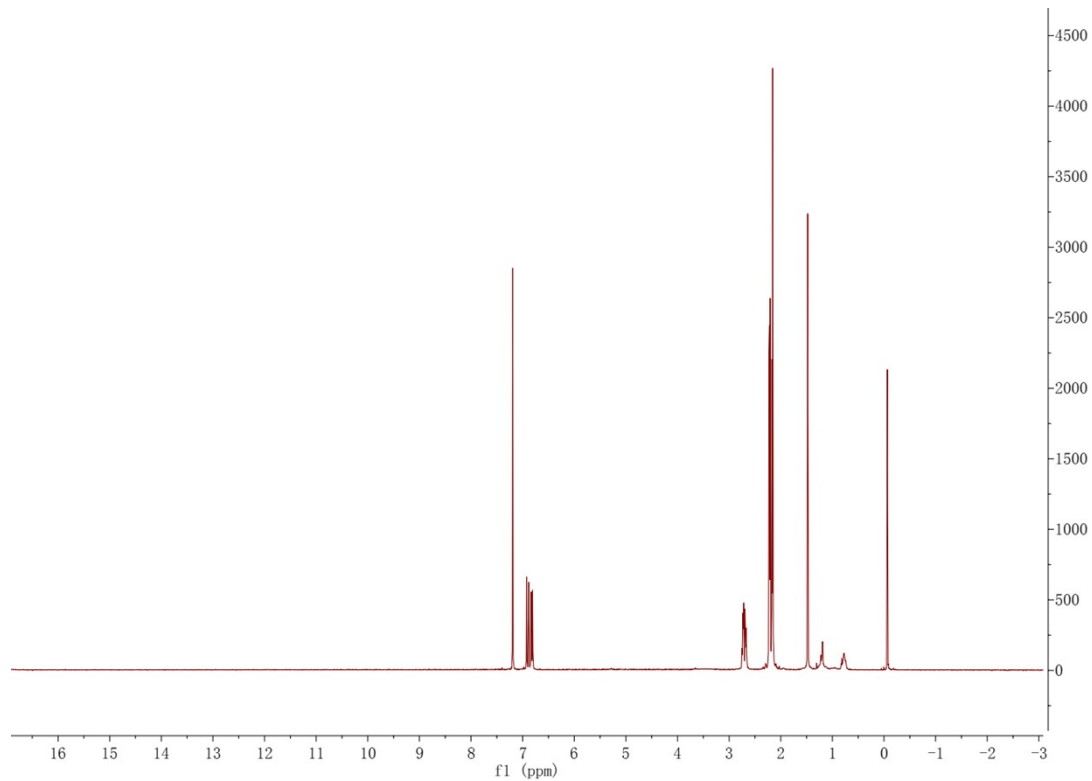

<sup>1</sup>H NMR of intermediate 1

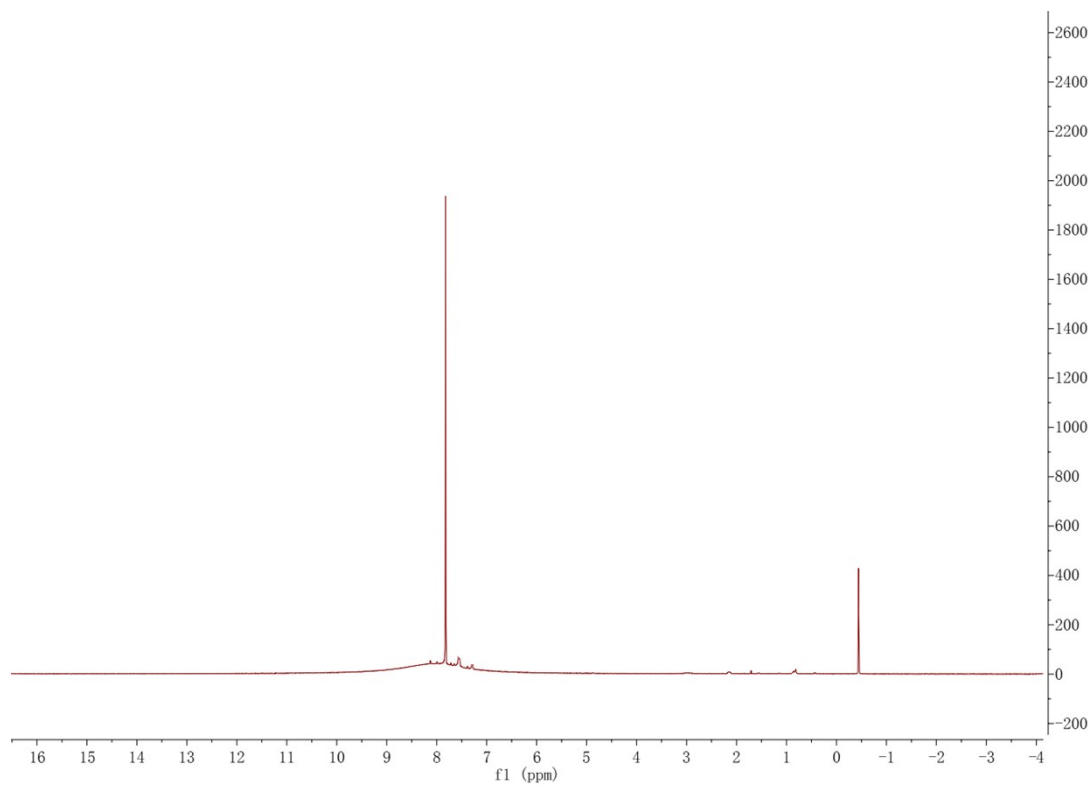

<sup>1</sup>H NMR of PMDA

Supplement: d3re00607g1.pdf [file d3re00607g1.pdf]
